# Supplementary material for: Selective sorption of PAHs from TX100 solution by resin SP850: effects of TX100 concentrations and PAHs solubility
Source: Royal Society of Chemistry journal article supplement (doi:10.1039/d0ra10513a), 2021-01-01
Supplement: d0ra10513a1.pdf [file d0ra10513a1.pdf]

## Supplementary Information

### Selective Sorption of PAHs from TX100 Solution by Resin

#### SP850: Effects of TX100 Concentrations and PAHs Solubility

Yaxiong Zeng<sup>a,b,c</sup>, Ming Zhang<sup>d</sup>, Daohui Lin<sup>a,b,c</sup>, Kun Yang<sup>a,b,c\*</sup>

<sup>a</sup>Department of Environmental Science, Zhejiang University, Hangzhou 310058, China;

<sup>b</sup>Key Laboratory of Environmental Pollution and Ecological Health of Ministry of Education, Hangzhou 310058, China;

<sup>c</sup>Zhejiang Provincial Key Laboratory of Organic Pollution Process and Control, Hangzhou 310058, China;

<sup>d</sup>Department of Environmental Engineering, China Jiliang University, Hangzhou 310018, China;

\*Corresponding author (Kun Yang). Tel.: 86-571-88982589; Fax: 86-571-88982590;  
E-mail: [kyang@zju.edu.cn](mailto:kyang@zju.edu.cn)

Number of pages: 8

Number of tables: 4

Number of figures: 4

Table S1 Freundlich model fitted isotherm parameters of PAHs by SP850 in the presence of TX100.

Table S2 Correlations of PAHs sorption coefficient ( $\log K_f$ ) with TX100 equilibrium concentrations ( $\log C_{e, TX100}$ )

Table S3 Results of linear regressions between  $\log K_f$  and  $\log S_w$  of PAHs.

Table S4 Parabolic equation fitted  $S^*$  values of PAHs by SP850 from TX100 solution

Figure S1 Freundlich model (solid lines) fitted isotherms of naphthalene (a), acenaphthene (b), phenanthrene (c), pyrene (d), anthracene (e) and benzanthracene (f) by SP850 at given TX100 initial concentrations ( $C_{0, TX100}$ ).

Figure S2 Calculated  $K_f$  values ( $\log K_{fcal}$ ) using equation 6 versus experimental  $K_f$  values ( $\log K_{fexp}$ ). Solid lines is the reference line,  $y = x$ , indicating that the  $\log K_{fcal}$  values equal to the  $\log K_{fexp}$  values. Dashed lines indicate the SD values from the reference lines.

Figure S3  $1/n$  values of 6 PAHs by SP850 from TX100 solution with their sequence number (Table S1). Solid line is the reference line of average  $1/n$  value ( $1/n = 0.775$ ) of 6 PAHs by SP850 from TX100 solution. Dashed lines indicate the SD value from the reference line.

Figure S4 Correlations between the modified selectivity parameters ( $S^*$ ) of phenanthrene by SP850 with various doses and TX100 equilibrium concentrations ( $C_{e, TX100}$ ). Solid lines are fitted by the Parabolic equation.

Table S1 Freundlich model fitted isotherm parameters of PAHs by SP850 in the presence of TX100<sup>a</sup>

| Sequence number | PAHs         | $C_{0, TX100}$ (mg/L) | $K_f$       | 1/n         | F     | P      | R <sup>2</sup> | N  |
|-----------------|--------------|-----------------------|-------------|-------------|-------|--------|----------------|----|
| 1               | Naphthalene  | 1500                  | 12.5±0.4    | 0.849±0.017 | 7455  | <0.001 | 0.998          | 16 |
| 2               |              | 2000                  | 6.85±0.33   | 0.823±0.018 | 5836  | <0.001 | 0.997          | 16 |
| 3               |              | 3000                  | 4.58±0.22   | 0.846±0.016 | 7921  | <0.001 | 0.998          | 16 |
| 4               |              | 5000                  | 2.22±0.05   | 0.874±0.007 | 49517 | <0.001 | 0.999          | 17 |
| 5               |              | 8000                  | 1.38±0.04   | 0.883±0.008 | 42974 | <0.001 | 0.999          | 16 |
| 6               |              | 10000                 | 0.814±0.027 | 0.853±0.008 | 32362 | <0.001 | 0.999          | 16 |
| 7               | Acenaphthene | 1500                  | 15.5±0.4    | 0.780±0.014 | 10170 | <0.001 | 0.998          | 14 |
| 8               |              | 2000                  | 11.0±0.4    | 0.758±0.014 | 9311  | <0.001 | 0.998          | 14 |
| 9               |              | 3000                  | 7.41±0.31   | 0.740±0.015 | 8049  | <0.001 | 0.997          | 14 |
| 10              |              | 5000                  | 4.34±0.19   | 0.774±0.014 | 9789  | <0.001 | 0.998          | 15 |
| 11              |              | 8000                  | 2.41±0.04   | 0.804±0.005 | 82914 | <0.001 | 0.999          | 14 |
| 12              |              | 10000                 | 1.80±0.05   | 0.805±0.008 | 32740 | <0.001 | 0.999          | 14 |
| 13              | Phenanthrene | 1500                  | 32.8±0.5    | 0.743±0.014 | 8891  | <0.001 | 0.998          | 16 |
| 14              |              | 2000                  | 17.3±0.2    | 0.749±0.007 | 36458 | <0.001 | 0.999          | 16 |
| 15              |              | 3000                  | 9.65±0.36   | 0.773±0.016 | 7507  | <0.001 | 0.997          | 16 |
| 16              |              | 5000                  | 4.89±0.09   | 0.803±0.006 | 48599 | <0.001 | 0.999          | 17 |
| 17              |              | 8000                  | 2.98±0.11   | 0.808±0.011 | 18186 | <0.001 | 0.999          | 16 |
| 18              |              | 10000                 | 2.03±0.07   | 0.817±0.010 | 20060 | <0.001 | 0.999          | 17 |
| 19              | Pyrene       | 1500                  | 24.2±0.3    | 0.745±0.019 | 4001  | <0.001 | 0.996          | 18 |
| 20              |              | 2000                  | 13.4±0.2    | 0.784±0.014 | 8787  | <0.001 | 0.998          | 19 |
| 21              |              | 3000                  | 9.10±0.32   | 0.801±0.022 | 3787  | <0.001 | 0.995          | 19 |
| 22              |              | 5000                  | 6.26±0.20   | 0.798±0.019 | 5536  | <0.001 | 0.996          | 16 |
| 23              |              | 8000                  | 2.94±0.11   | 0.863±0.015 | 10233 | <0.001 | 0.998          | 19 |
| 24              |              | 10000                 | 2.22±0.14   | 0.874±0.024 | 4107  | <0.001 | 0.996          | 19 |

| Sequence number | PAHs           | $C_{0,TX100}$ (mg/L) | $K_f$     | 1/n         | F     | P      | R <sup>2</sup> | N  |
|-----------------|----------------|----------------------|-----------|-------------|-------|--------|----------------|----|
| 25              | Anthracene     | 1500                 | 34.9±0.6  | 0.714±0.011 | 10817 | <0.001 | 0.998          | 19 |
| 26              |                | 2000                 | 24.3±0.2  | 0.776±0.010 | 18985 | <0.001 | 0.999          | 19 |
| 27              |                | 3000                 | 13.9±0.1  | 0.753±0.009 | 22058 | <0.001 | 0.999          | 18 |
| 28              |                | 4000                 | 9.51±0.08 | 0.742±0.012 | 10974 | <0.001 | 0.998          | 19 |
| 29              |                | 5000                 | 7.08±0.07 | 0.71±0.01   | 11767 | <0.001 | 0.998          | 19 |
| 30              |                | 8000                 | 5.26±0.06 | 0.777±0.011 | 15197 | <0.001 | 0.999          | 19 |
| 31              |                | 10000                | 3.51±0.05 | 0.779±0.009 | 20332 | <0.001 | 0.999          | 19 |
| 32              | Benzanthracene | 1500                 | 38.5±0.7  | 0.701±0.012 | 9377  | <0.001 | 0.998          | 19 |
| 33              |                | 2000                 | 25.6±0.3  | 0.699±0.012 | 9259  | <0.001 | 0.998          | 19 |
| 34              |                | 3000                 | 14.4±0.1  | 0.742±0.008 | 27872 | <0.001 | 0.999          | 18 |
| 35              |                | 4000                 | 9.70±0.04 | 0.695±0.006 | 43623 | <0.001 | 0.999          | 19 |
| 36              |                | 5000                 | 7.43±0.05 | 0.702±0.008 | 24906 | <0.001 | 0.999          | 19 |
| 37              |                | 8000                 | 5.84±0.06 | 0.715±0.009 | 18970 | <0.001 | 0.999          | 19 |
| 38              |                | 10000                | 4.22±0.05 | 0.685±0.008 | 19098 | <0.001 | 0.999          | 19 |

<sup>a</sup> All estimated parameter values and their standard errors were determined by a commercial software (SPSS 20.0) with nonlinear regression; N is the number of experimental data.

Table S2 Correlations of PAHs sorption coefficient ( $\log K_f$ ) with TX100 equilibrium concentrations ( $\log C_{e,TX100}$ )<sup>a</sup>

| PAHs           | Equations                                                       | F    | P      | R <sup>2</sup> | N |
|----------------|-----------------------------------------------------------------|------|--------|----------------|---|
| Naphthalene    | $\log K_f = -0.935(\pm 0.038)\log C_{e,TX100} + 3.75(\pm 0.13)$ | 608  | <0.001 | 0.995          | 5 |
| Acenaphthene   | $\log K_f = -0.831(\pm 0.049)\log C_{e,TX100} + 3.60(\pm 0.17)$ | 291  | <0.001 | 0.986          | 6 |
| Phenanthrene   | $\log K_f = -1.05(\pm 0.02)\log C_{e,TX100} + 4.49(\pm 0.08)$   | 1993 | <0.001 | 0.998          | 6 |
| Pyrene         | $\log K_f = -0.882(\pm 0.063)\log C_{e,TX100} + 3.89(\pm 0.22)$ | 196  | <0.001 | 0.980          | 6 |
| Anthracene     | $\log K_f = -0.883(\pm 0.034)\log C_{e,TX100} + 4.08(\pm 0.12)$ | 658  | <0.001 | 0.992          | 7 |
| Benzanthracene | $\log K_f = -0.857(\pm 0.036)\log C_{e,TX100} + 4.02(\pm 0.12)$ | 575  | <0.001 | 0.991          | 7 |

<sup>a</sup> All estimated parameter values and their standard errors were determined by a commercial software (SPSS 20.0) with linear regression; N is the number of experimental data.

Table S3 Results of linear regressions between  $\log K_f$  and  $\log S_w$  of PAHs<sup>a</sup>

| $C_{0, TX100}$ (mg/L) | $\alpha$       | $\beta$       | F    | P     | R <sup>2</sup> | N |
|-----------------------|----------------|---------------|------|-------|----------------|---|
| 1500                  | -0.136(±0.039) | 1.34(±0.05)   | 12.4 | 0.024 | 0.756          | 6 |
| 2000                  | -0.154(±0.035) | 1.12(±0.04)   | 19.4 | 0.012 | 0.829          | 6 |
| 3000                  | -0.135(±0.024) | 0.918(±0.029) | 32.0 | 0.005 | 0.889          | 6 |
| 5000                  | -0.143(±0.025) | 0.652(±0.030) | 33.6 | 0.004 | 0.894          | 6 |
| 8000                  | -0.170(±0.026) | 0.436(±0.032) | 41.7 | 0.003 | 0.912          | 6 |
| 10000                 | -0.186(±0.028) | 0.270(±0.035) | 43.6 | 0.003 | 0.916          | 6 |

<sup>a</sup> All estimated parameter values and standard errors were determined by a commercial software (SPSS 20.0) with linear regression; N is the number of experimental data.

Table S4 Parabolic equation fitted  $S^*$  values of PAHs by SP850 from TX100 solution<sup>a</sup>

| PAHs          | A/( $\times 10^{-8}$ ) <sup>b</sup> | B/( $\times 10^{-4}$ ) <sup>b</sup> | F    | P       | R <sup>2</sup> | N  | B/(-2A) <sup>c</sup> |
|---------------|-------------------------------------|-------------------------------------|------|---------|----------------|----|----------------------|
| Naphthalene   | -12.6(±1.11)                        | 10.5(±0.89)                         | 70.8 | 0.00109 | 0.928          | 6  | 4167                 |
| Acenaphthene  | -7.16(±0.61)                        | 10.2(±0.72)                         | 136  | <0.001  | 0.862          | 8  | 7121                 |
| Phenanthrene  | -7.03(±0.61)                        | 11.1(±0.7)                          | 205  | <0.001  | 0.695          | 8  | 7895                 |
| Pyrene        | -4.88(±0.56)                        | 9.79(±0.89)                         | 79.0 | <0.001  | 0.757          | 8  | 10021                |
| Anthracene    | -2.77(±0.19)                        | 9.85(±0.56)                         | 201  | <0.001  | 0.877          | 11 | 17772                |
| Benanthracene | -2.65(±0.19)                        | 10.3(±0.5)                          | 290  | <0.001  | 0.905          | 11 | 19457                |

<sup>a</sup> All estimated parameter values and standard errors were determined by a commercial software (SPSS 20.0) with nonlinear regression; N is the number of experimental data;

<sup>b</sup> A and B are the coefficients of the quadratic and primary terms of the parabolic equation, respectively;

<sup>c</sup>  $C_{e, TX100} = -B/(2A)$  are the optimal TX100 concentrations ( $C_{op, TX100}$ ) in soil washing solution.

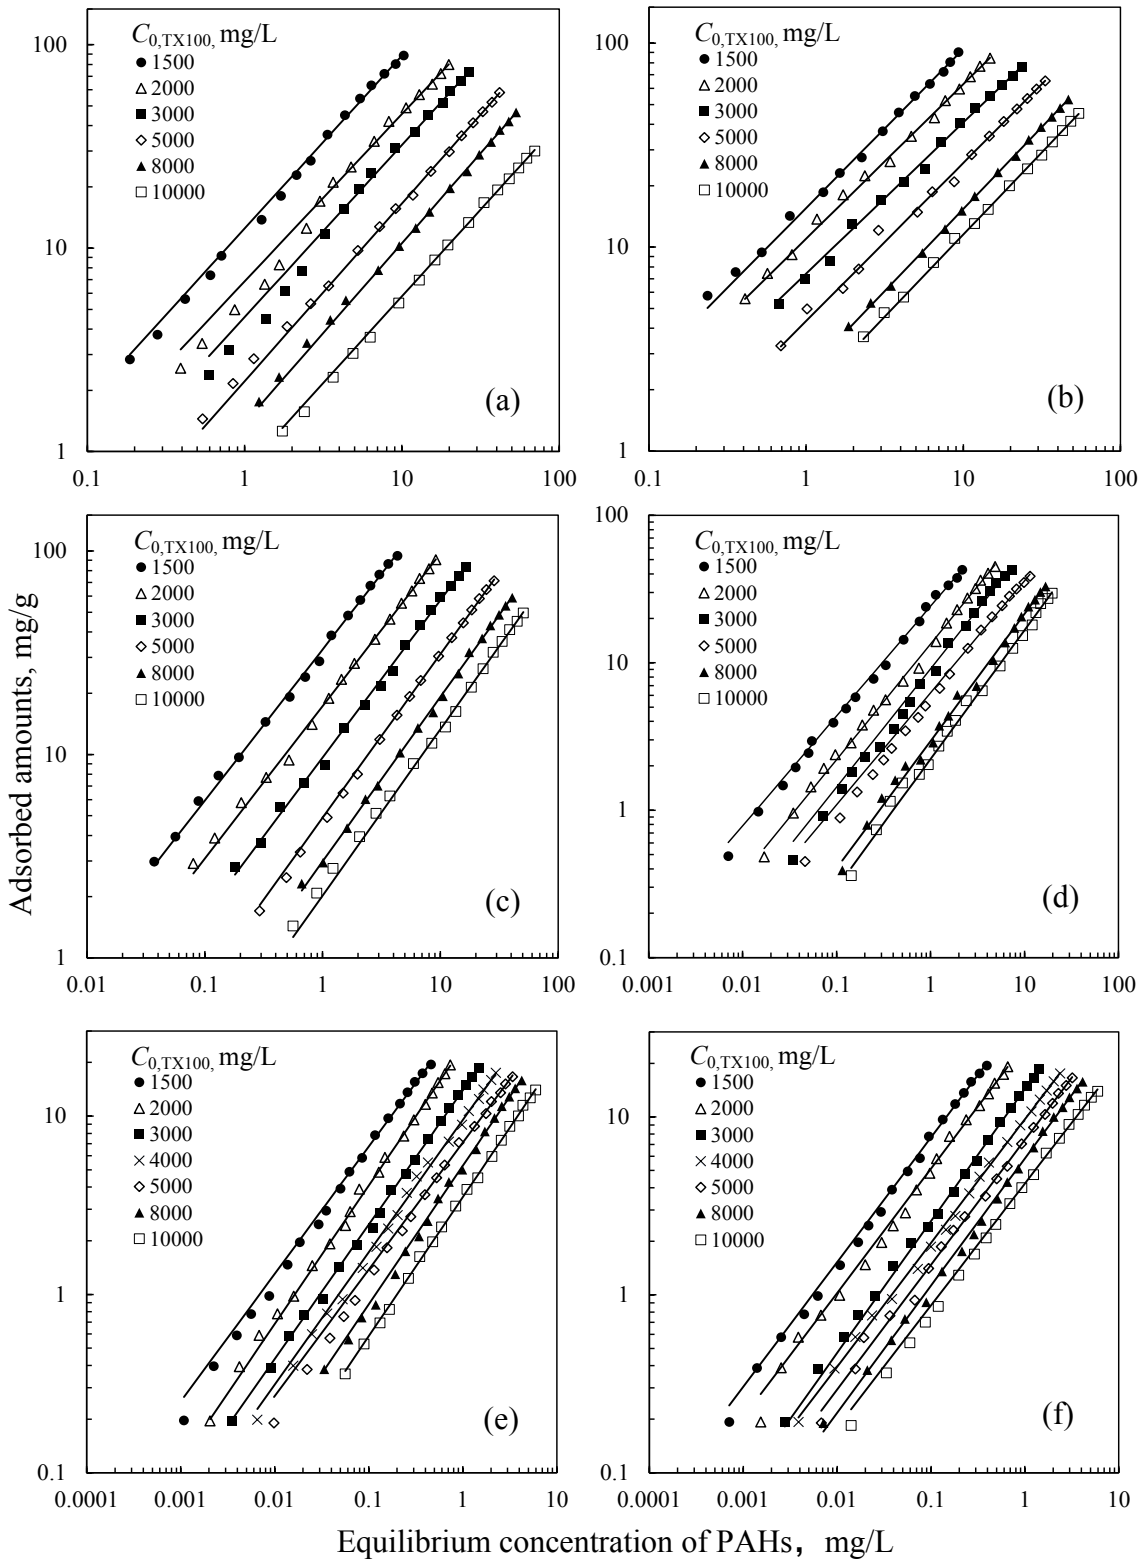

Figure S1 Freundlich model (solid lines) fitted isotherms of naphthalene (a), acenaphthene (b), phenanthrene (c), pyrene (d), anthracene (e) and benzanthracene (f) by SP850 at given TX100 initial concentrations ( $C_{0, TX100}$ ).

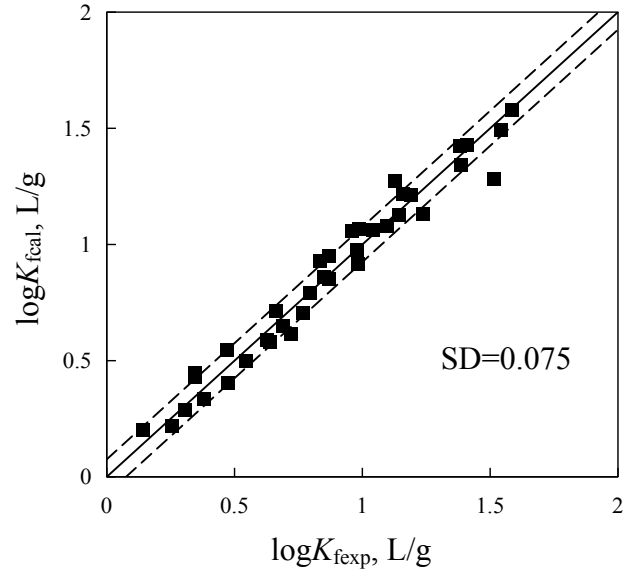

Figure S2 Calculated  $K_f$  values ( $\log K_{fcal}$ ) using equation 6 versus experimental  $K_f$  values ( $\log K_{fexp}$ ). Solid lines is the reference line,  $y = x$ , indicating that the  $\log K_{fcal}$  values equal to the  $\log K_{fexp}$  values. Dashed lines indicate the SD values from the reference lines.

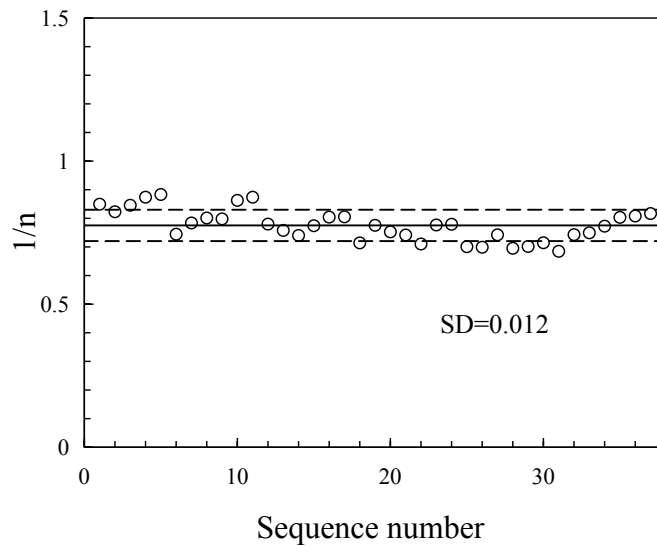

Figure S3  $1/n$  values of 6 PAHs by SP850 from TX100 solution with their sequence number (Table S1). Solid line is the reference line of average  $1/n$  value ( $1/n=0.775$ ) of 6 PAHs by SP850 from TX100 solution. Dashed lines indicate the SD value from the reference line.

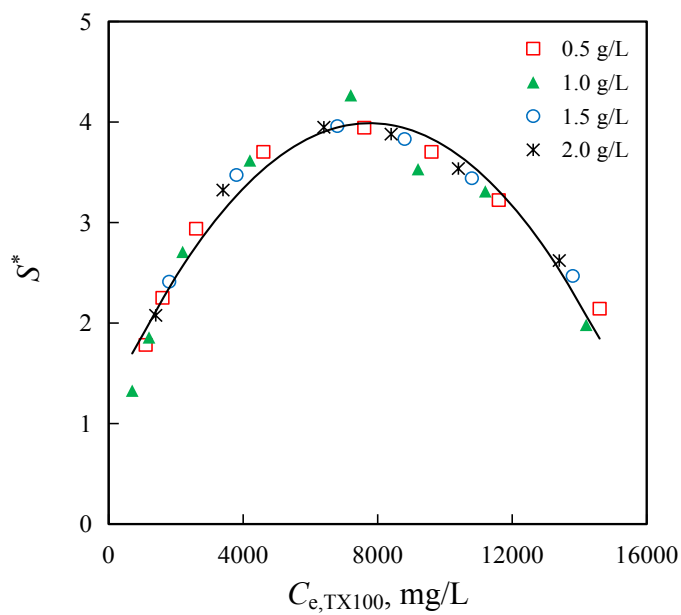

Figure S4 Correlations between the modified selectivity parameters ( $S^*$ ) of phenanthrene by SP850 with various doses and TX100 equilibrium concentrations ( $C_{e, TX100}$ ). Solid lines are fitted by the Parabolic equation.
